# Supplementary material for: Mindfulness-induced endogenous theta stimulation occasions self-transcendence and inhibits addictive behavior
Source: PubMed Central journal article supplement (PMC9555770; doi:10.1126/sciadv.abo4455), 2022-10-12

Supplementary Materials for  
**Mindfulness-induced endogenous theta stimulation occasions  
self-transcendence and inhibits addictive behavior**

Eric L. Garland *et al.*

Corresponding author: Eric L. Garland, [eric.garland@socwk.utah.edu](mailto:eric.garland@socwk.utah.edu)

*Sci. Adv.* **8**, eabo4455 (2022)  
DOI: 10.1126/sciadv.abo4455

**This PDF file includes:**

Fig. S1

**Figure S1. Theta power topomaps for patients in Mindfulness-Oriented Recovery Enhancement (MORE) and Supportive Group (SG) Psychotherapy at pre- and post-treatment.**

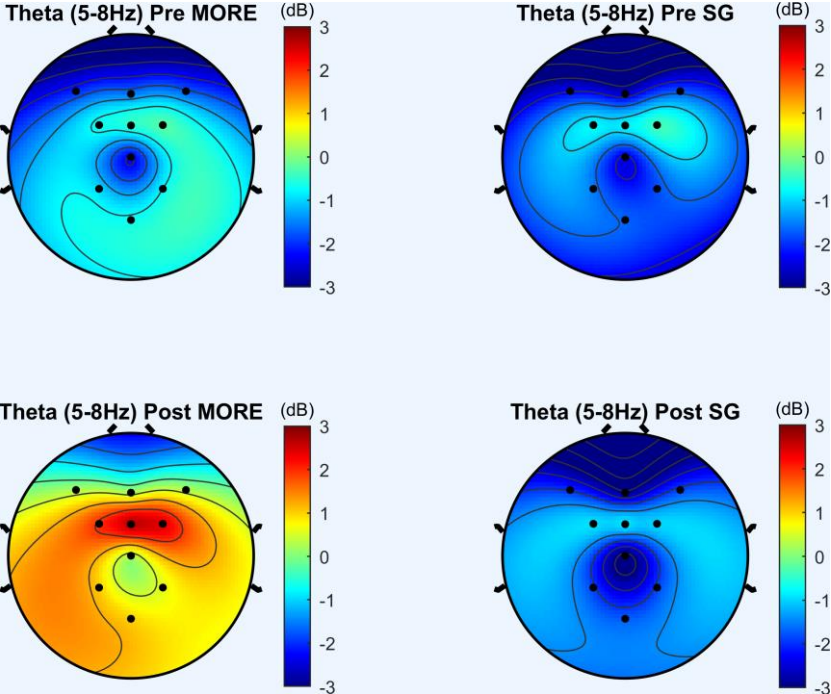

Supplement: sciadv.abo4455_sm.pdf [file sciadv.abo4455_sm.pdf]
